# Supplementary material for: Acid–Base Pretreatment and Enzymatic Hydrolysis of Palm Oil Mill Effluent in a Single Reactor System for Production of Fermentable Sugars
Source: Hindawi journal article supplement (doi:10.1155/2023/8711491), 2023-05-08
Supplement: f1 [file 8711491.f1.docx]

**Acid-Base Pretreatment and ENZYMatic Hydrolysis of Palm Oil Mill Effluent in a single reactor system for production of fermentable sugarS**

Nibedita Deb1, Md. Zahangir Alam1*, Tawfikur Rahman12, Ma’an Fahmi Rashid Al-Khatib1, Mohammed Saedi Jami1 and Mariatul Fadzillah Bt. Mansor1

**1** Bioenvironmental engineering research center (BERC), Department of biotechnology engineering, faculty of engineering, International Islamic university Malaysia, 50728, Kuala Lumpur, Malaysia.

2Department of electrical and electronic engineering, faculty of engineering, international university of business agriculture and technology, Uttara, Dhaka 1230, Bangladesh.

## Supplementary Materials

**Effect of Initial Enzyme Dose**

| 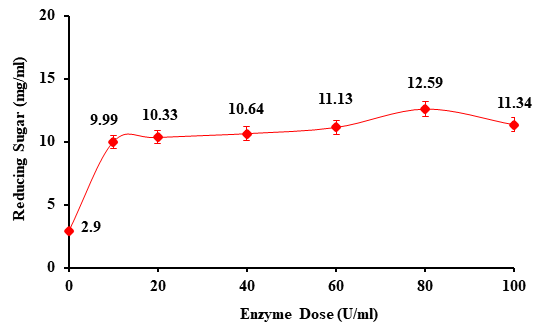 |
| --- |
| Fig. S1. Effect of initial enzyme dose on hydrolysis. Other factors were fixed at 5 % (w/v) TSS, 1 % (v/v) diluted H2S04, H2S04 dose 4%, time 60 minutes, agitation 150 rpm, 3 % (w/v) diluted NaOH, pH 6 and room temperature 30oC (± 2). |

**Response Surface Methodology (RSM) for Hydrolysis**

Table S1. Faced centered central composite design (FCCCD) experimental design for selection of medium components and process conditions for reducing sugar yield.

|  | **Factor 1** | **Factor 2** | **Response** | |
| --- | --- | --- | --- | --- |
| Run | A: Substrate Concentration | B: Enzyme Does | Reducing Sugar (Actual) | Reducing Sugar (Predicted) |
|  | % w/v | U | mg/ml | mg/ml |
| **1** | **5** | **80** | **25.95** | **26.13** |
| 2 | 6 | 60 | 18.34 | 18.06 |
| **3** | **5** | **80** | **25.91** | **26.13** |
| **4** | **5** | **80** | **26.57** | **26.13** |
| 5 | 6 | 80 | 21.68 | 21.91 |
| 6 | 6 | 100 | 20.43 | 20.48 |
| 7 | 4 | 80 | 21.23 | 21.19 |
| 8 | 5 | 100 | 23.47 | 23.24 |
| 9 | 5 | 60 | 23.34 | 23.76 |
| **10** | **5** | **80** | **26.24** | **26.13** |
| 11 | 4 | 60 | 20.43 | 20.29 |
| 12 | 4 | 100 | 16.64 | 16.82 |
| **13** | **5** | **80** | **26.17** | **26.13** |

*Bold indicates center points
